# Supplementary material for: Boosting oxygen evolution kinetics via sulfur/phosphorus dynamic migration induced surface enrichment in an anion-regulated iron selenide
Source: Royal Society of Chemistry journal article supplement (doi:10.1039/d4ta01867b), 2024-01-01
Supplement: d4ta01867b1.pdf [file d4ta01867b1.pdf]

## **Boosting Oxygen Evolution Kinetics via Sulfur/Phosphorus Dynamic Migration Induced Surface Enrichment in an Anion-Regulated Iron Selenide**

Bezawit Z. Desalegn<sup>a,b,†</sup>, Reibelle Q. Raguindin<sup>c,†</sup>, Gaojun Jiang<sup>a</sup>,  
Hyung-Ho Park<sup>d</sup>, and Jeong Gil Seo<sup>a,b,\*</sup>

<sup>a</sup> *Department of Chemical Engineering, Hanyang University, Seoul 04763, Republic of Korea*

<sup>b</sup> *Clean-Energy Research Institute, Hanyang University, Seoul 04763, Republic of Korea*

<sup>c</sup> *Renewable and Sustainable Energy Research Center, Technology Innovation Institute, Abu  
Dhabi, United Arab Emirates*

<sup>d</sup> *Department of Materials Science and Engineering, Yonsei University, Seoul 03722, Republic of  
Korea*

*\*Corresponding author: +82-2-2220-0520, [jgseo@hanyang.ac.kr](mailto:jgseo@hanyang.ac.kr)*

*† B.Z. Desalegn and R.Q. Raguindin contributed equally.*

### **Supporting information**

## **1. Experimental Section**

## **2. Experimental Section**

### **1.1. Synthesis of Electrocatalysts**

#### **Synthesis of FeSe<sub>2</sub>, FeS<sub>2</sub> and FeP**

The catalysts were synthesized following a previously reported method with some modifications<sup>1</sup>. Specifically, 15 mmol of NaOH and 7.5 of mmol elemental selenium powder were dissolved in 50 mL of dimethylformamide, after which 1 mL of hydrazine hydrate was added to the solution and stirred for 3 h. Then, 3.75 mmol iron nitrate nonahydrate was added to the above solution and stirred for 30 min. The mixture was transferred to a 100 mL Teflon-lined autoclave and maintained at a temperature of 180 °C for 12 h. After the reaction, the black precipitate was washed with deionized water and ethanol several times, respectively, and dried under vacuum at 60 °C for 12 h. FeS and FeP were synthesized via the same procedure using elemental sulfur and red phosphorus instead of elemental selenium.

#### **Synthesis of anion-regulated FeSe<sub>2</sub>**

The S and P-regulated FeSe<sub>2</sub> were synthesized by following the same procedure as FeSe<sub>2</sub> with partial replacement of Se with S or P, respectively (Figure 1a). The as-synthesized anion-regulated catalysts are denoted as follows throughout the manuscript: S-regulated FeSe<sub>2</sub> (SR-X-FeSe<sub>2</sub>) and P-regulated FeSe<sub>2</sub> (PR-X-FeSe<sub>2</sub>). X denotes the mole percentage of S or P.

### **1.2. Electrode preparation**

5 mg of electrocatalyst was added in a 0.5 mL of deionized water containing 10 μL of nafion and sonicated for 2 h. Prior to drop-casting of the electrocatalyst ink, nickel foam was ultrasonically cleaned in 1M HCl, DI water, and ethanol for 20 min each, respectively, and dried at 80 °C for further use. The back and front of the nickel foam was covered with epoxide resin to expose a 5 × 5 mm of geometrical area. 40 μL of the catalyst ink was drop casted on the nickel foam and dried at 60 °C for 12 h. Four sets of electrodes were prepared per sample to obtain reproducible results.

### 1.3. Electrochemical Measurements

All electrochemical measurements were conducted on an SP2 ZIVE electrochemical workstation with a conventional three-electrode cell. A saturated Ag/AgCl electrode and Pt wire were used as reference and counter electrodes, respectively. The prepared aerogels loaded on nickel foam were used as the working electrode, with an exposed geometrical area of  $0.5 \times 0.5 \text{ cm}^2$ . All the potentials reported in this study are quoted with respect to the reversible hydrogen electrode (RHE) after 90% IR correction.

$$E_{\text{RHE}} = E_{(\text{Ag}/\text{AgCl})} + 0.197 + 0.059\text{pH}$$

### 1.4. Electrocatalyst Characterization

#### Physico-chemical and surface analysis

X-ray powder diffraction (Bruker D8 ADVANCE X-Ray Diffractometer equipped with Cu  $K\alpha$  radiation ( $\lambda=0.15406 \text{ nm}$ )) was used to study the structure of the as-prepared electrodes. The morphology and elemental distribution of the samples were studied by field emission scanning electron microscopy (FE-SEM) (FEI Verios G4 UC, Extreme High-Resolution Scanning Electron Microscope). X-ray photoelectron spectra were taken on a Thermo Scientific K-alpha plus photospectrometer using the monochromatic Al  $K\alpha$  source (1486.7 eV). Low-resolution survey and high-resolution region scan at the binding energies of interest were taken for each sample. The XPS depth profiling was conducted on a K-alpha plus (Thermo Scientific\_USA) with a dual-beam ion source and ultra-low energy co-axial electron and  $\text{Ar}^+$  ion beam (100eV-4 keV) and Al  $K\alpha$  (1486.6 eV), variable spot size (30-400 $\mu\text{m}$ ) X-ray by using argon sputtering to reveal a new layer with a standard sputtering rate and sputtering time of 100nm/1444s for 600 s and 30s, respectively with a 30 s increment. To avoid damaging the samples during depth profiling, the spectrometer was operated in the gas cluster ion itching mode. Inductively Coupled Plasma Spectroscopy (ICP-OES) was measured using a Thermo Fisher Scientific iCAP 7400DUO ICP spectrometer. Electron paramagnetic Resonance (EPR) analysis was conducted using EMXplus-9.5/12/P/L with a magnetic field range of -13 KG-13 KG and an absolute sensitivity of  $1.6 \times 10^{-9}$  spins and a modulation frequency of 4-100 kHz (1 kHz step) at room temperature. The measurements were

conducted in the X-band at room temperature at a frequency of 9.86 GHz and a modulation frequency of 100 kHz. For EPR analysis after OER, the catalyst ink was loaded on Cu-foam to avoid magnetic interference from Ni-foam.

### **Catalyst-intermediate/product interaction analysis**

NH<sub>3</sub> and O<sub>2</sub> TPD measurements were conducted on a MICROTRAC BELCAT catalyst analyzer. NH<sub>3</sub> TPD was conducted to examine the catalyst-intermediate interaction while O<sub>2</sub> TPD was conducted to analyze the catalyst-product interaction. For NH<sub>3</sub> TPD measurements, all samples were preheated at 300°C with a heating rate of 10°C min<sup>-1</sup> for 1h to clean the surface. Afterwards, the samples were cooled to 100°C, where NH<sub>3</sub> (10% NH<sub>3</sub> in Helium) was chemisorbed for 1h. The chemisorbed NH<sub>3</sub> was desorbed by increasing the temperature to 900°C with a ramping rate of 10°C min<sup>-1</sup> under the flow of pure helium.

For O<sub>2</sub> TPD, the samples were preheated at 150°C under pure argon at a heating rate of 10°C min<sup>-1</sup> and kept at this temperature for 1 h. After cooling the sample to room temperature, adsorption of O<sub>2</sub> was carried out in flowing O<sub>2</sub> (5% O<sub>2</sub> in Argon) for 1 h at 30 °C. Then the gas was switched to pure argon for 30 minutes. Finally, the desorption measurement was carried out by increasing the temperature to 700°C with a heating rate of 10°C min<sup>-1</sup> under the flow of pure argon.

### **1.5. Quantification of Produced Oxygen**

The produced oxygen was quantified using an online gas chromatography equipped with a TCD detector with argon gas as the reference. Before the start of the GC analysis, the electrochemical cell containing the electrolyte was purged with argon for 15 minutes and the reaction was conducted under a continuous flow of argon gas.

The faradaic efficiency is calculated based on the actual produced oxygen as follows.

$$\text{FE (\%)} = \frac{\text{Actual oxygen production}}{\text{Theoretical oxygen production}}$$

$$\text{Theoretical oxygen production} = \frac{I \times t}{4F}$$

Where,

$I$  = Current in A

$t$  = time in s

$F$  = Faraday's constant and 4 is the number of electrons required to produce one more of  $O_2$  gas.

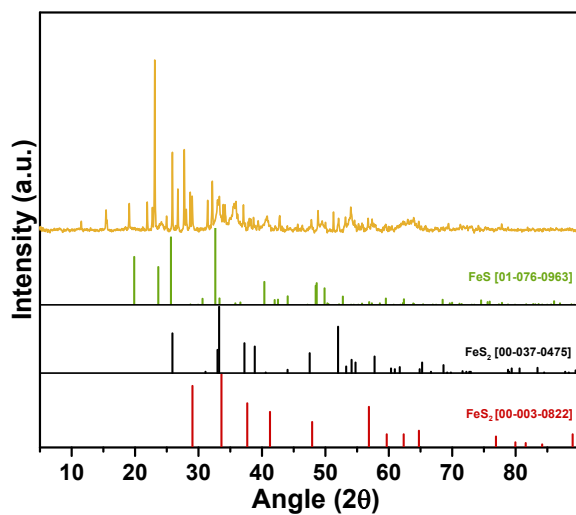

**Figure S1:** XRD pattern of FeS<sub>2</sub> with standard reference patterns.

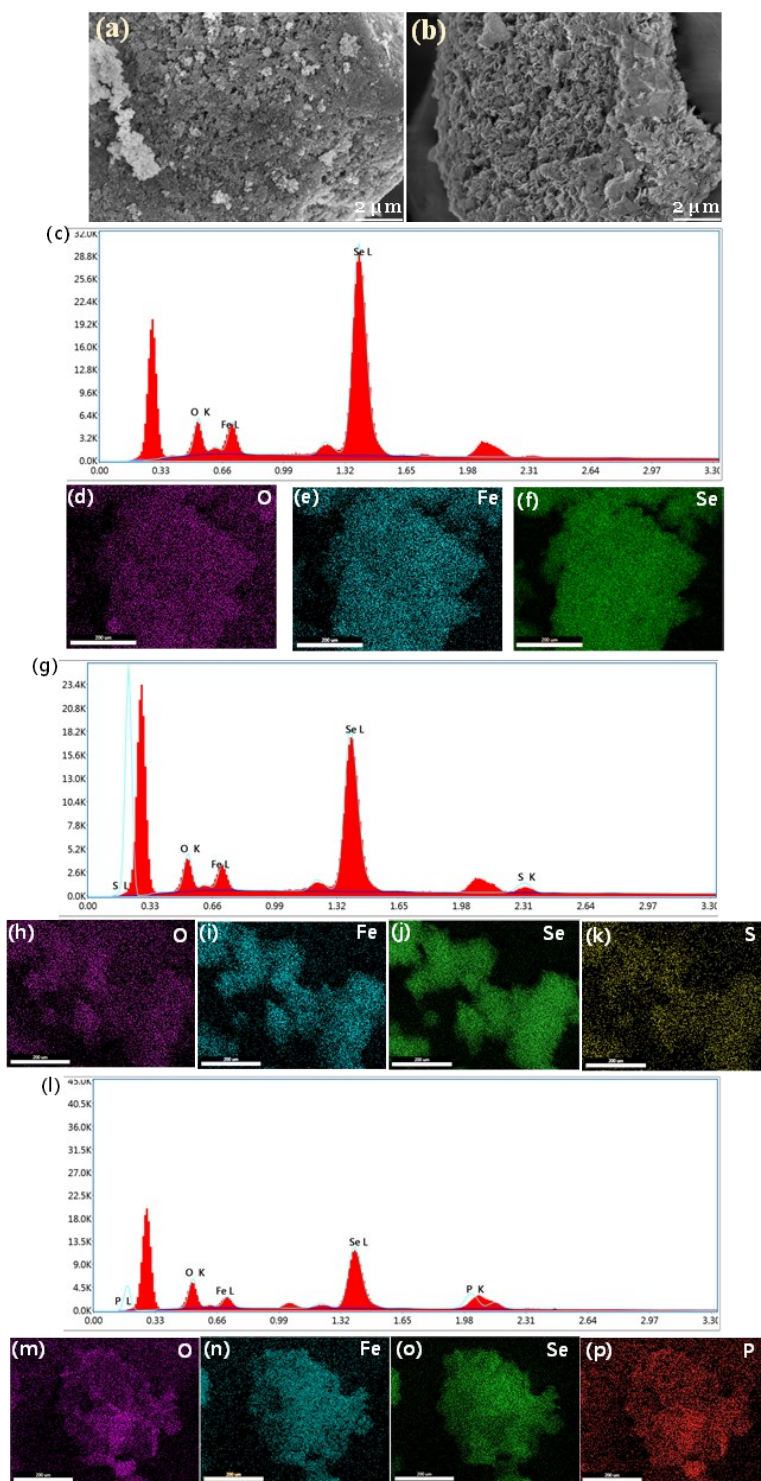

**Figure S2:** FE-SEM images of (a) FeP and (b) FeSe<sub>2</sub>, Elemental mappings and EDS of (c-f) FeSe<sub>2</sub>, (g-k) SR-10FeSe<sub>2</sub>, and (l-p) PR-30FeSe<sub>2</sub>.

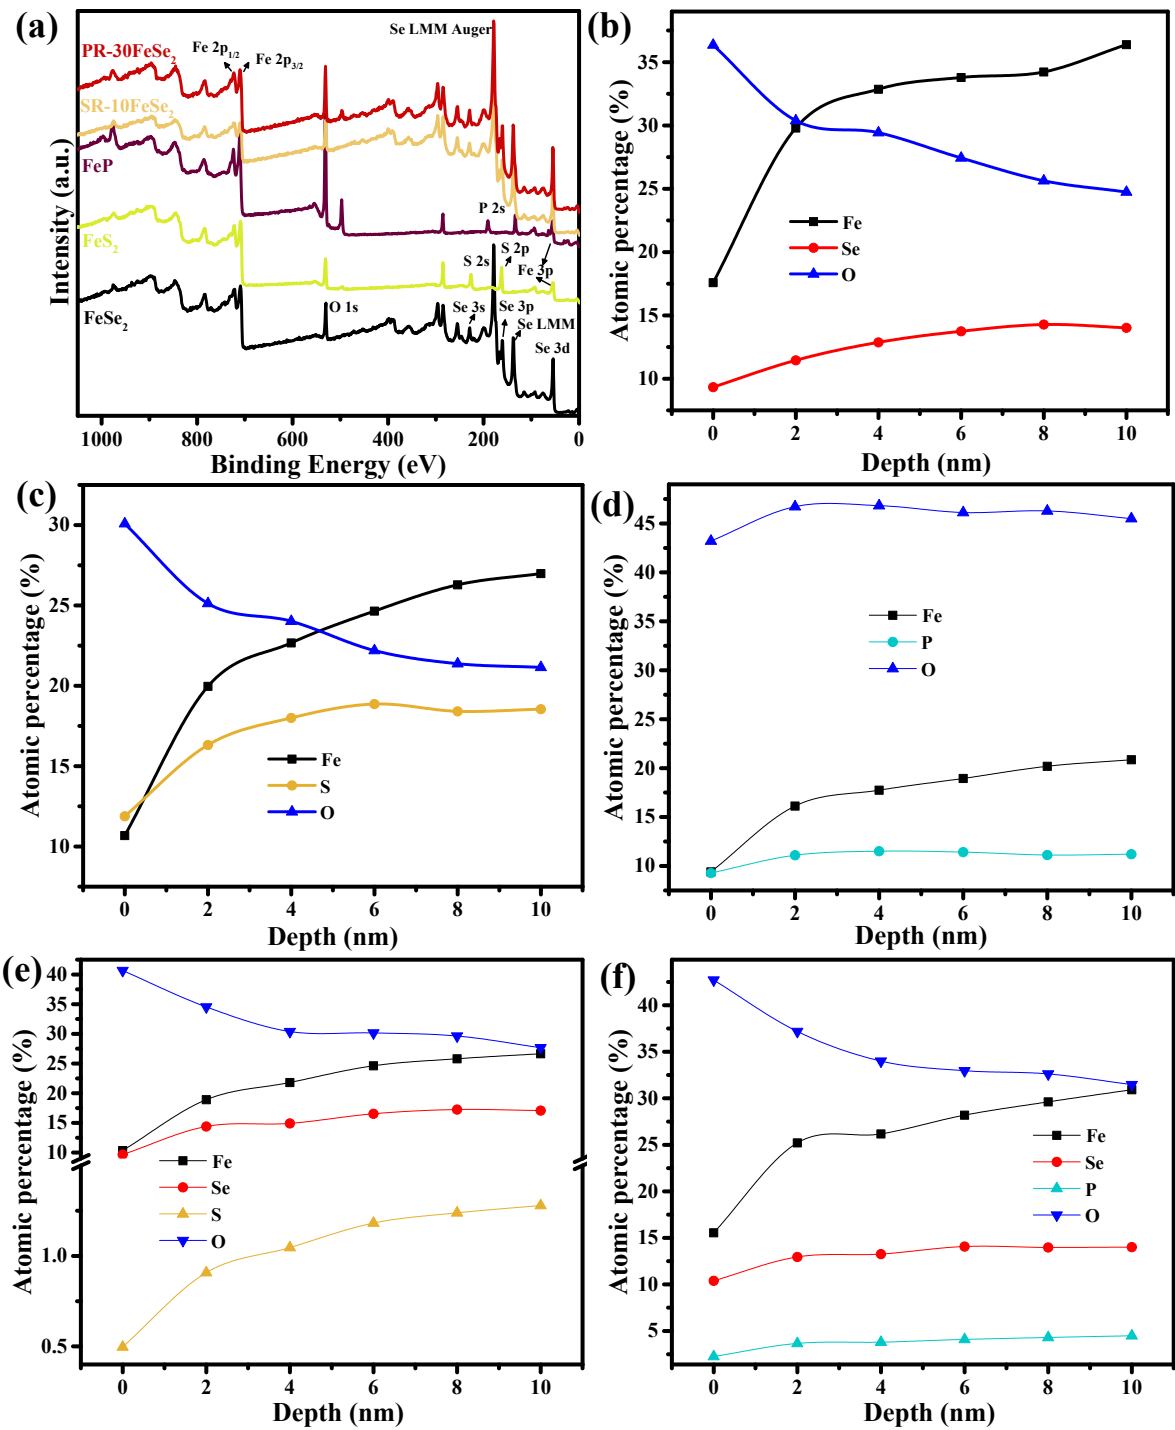

**Figure S3:** (a) XPS survey and atomic percentage of elements with depth (b) FeSe<sub>2</sub>, (c) FeS<sub>2</sub>, (d) FeP, (e) SR-10FeSe<sub>2</sub>, and (f) PR-30FeSe<sub>2</sub>.

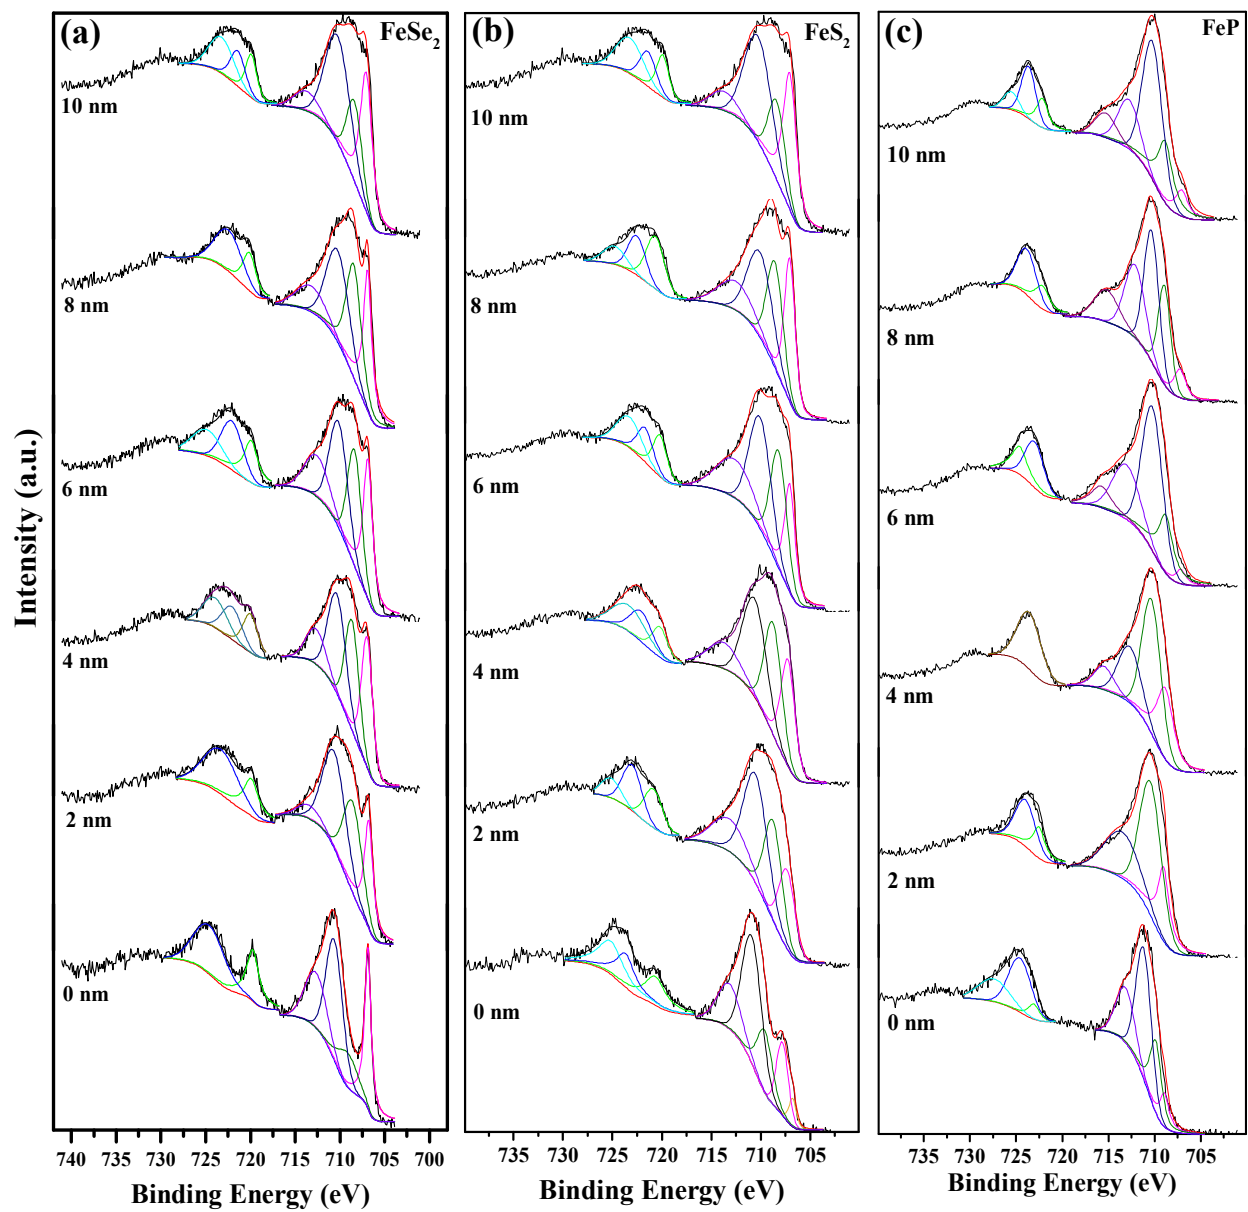

**Figure S4:** Fe 2p spectra with depth; (a) FeSe<sub>2</sub>, (b) FeS<sub>2</sub>, and (c) FeP



**Table S1:** Mole Fractions of Fe and anions from ICP-OES analysis.

| Electrocatalysts       | Mole Fraction (%) |    |   |     |
|------------------------|-------------------|----|---|-----|
|                        | Fe                | Se | S | P   |
| SR-10FeSe <sub>2</sub> | 33                | 63 | 3 | 0   |
| PR-30FeSe <sub>2</sub> | 34                | 58 | 0 | 8.4 |

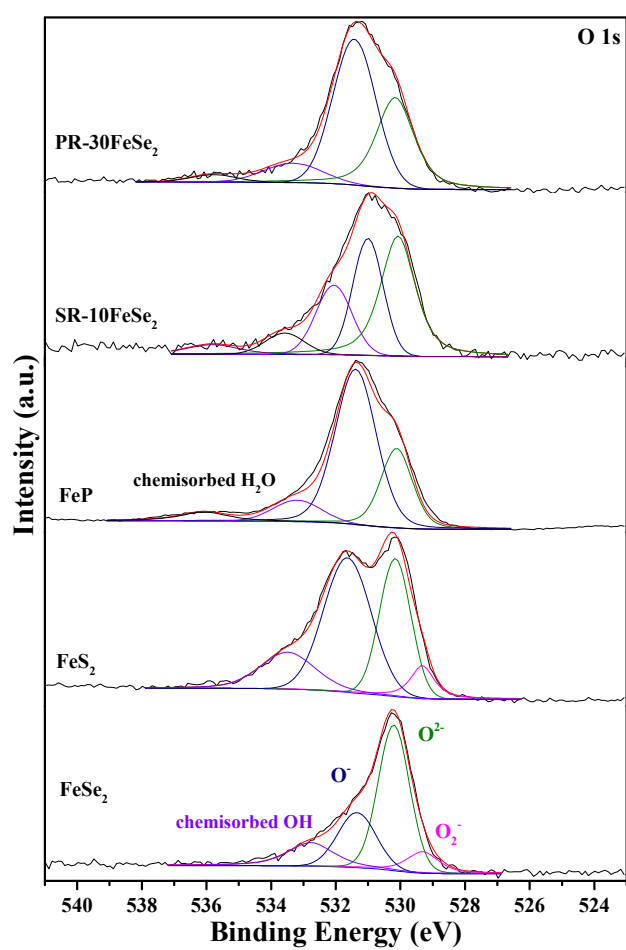

**Figure S5:** O 1s XPS spectrum.

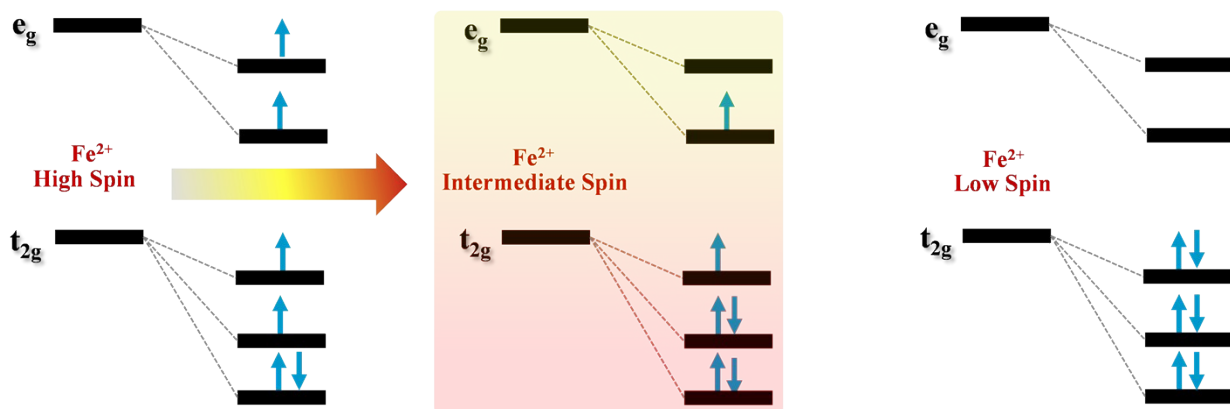

**Scheme S1:** Schematic illustration of transition of the change in  $\text{Fe}^{2+}$  spin state with anion-regulation.

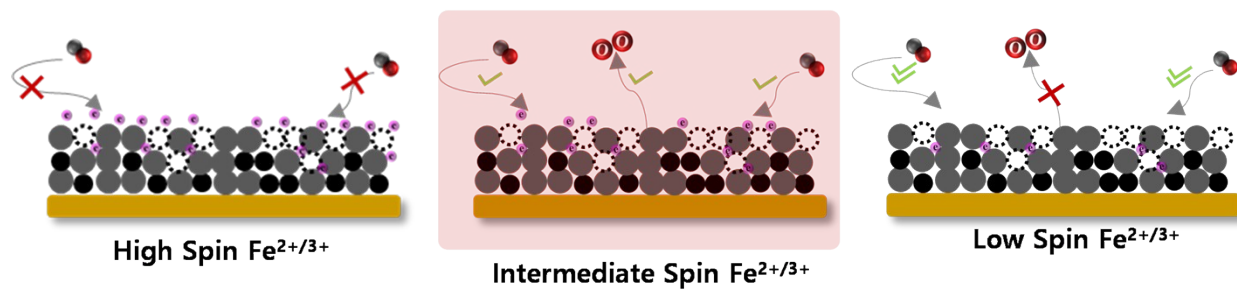

**Scheme S2:** Schematic illustration of the effect of  $e_g$  electrons on OER elementary steps.

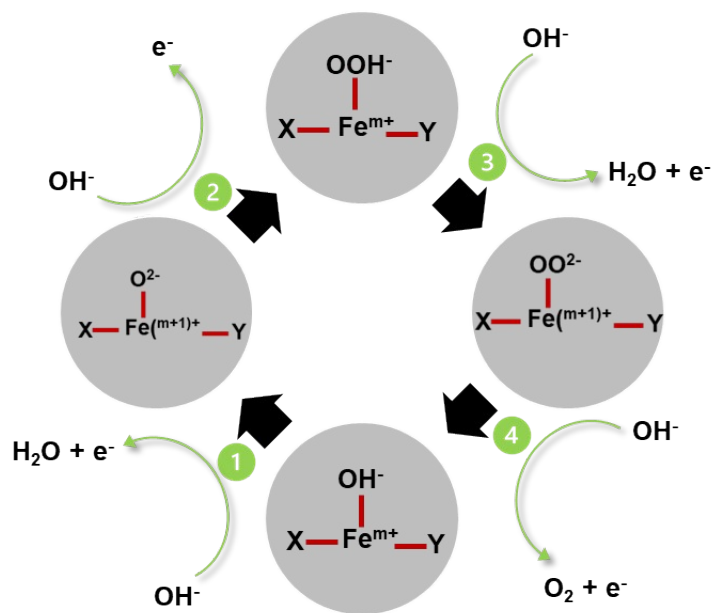

**Scheme S3:** Elementary steps of OER for anion-regulated FeSe<sub>2</sub>. (X and Y denote Se and S/P anions, respectively)

**Table S2:** ICP-OES results of the electrolyte after 2h of OER.

| Electrocatalysts       | Concentration (ppm) |      |       |       |
|------------------------|---------------------|------|-------|-------|
|                        | Fe                  | Se   | S     | P     |
| FeSe <sub>2</sub>      | -                   | 4.41 | -     | -     |
| FeS <sub>2</sub>       | -                   | -    | 16.01 | -     |
| FeP                    | -                   | -    | -     | 15.27 |
| SR-10FeSe <sub>2</sub> | -                   | 7.16 | 8.71  | -     |
| PR-30FeSe <sub>2</sub> | -                   | 5.16 | -     | 9.01  |

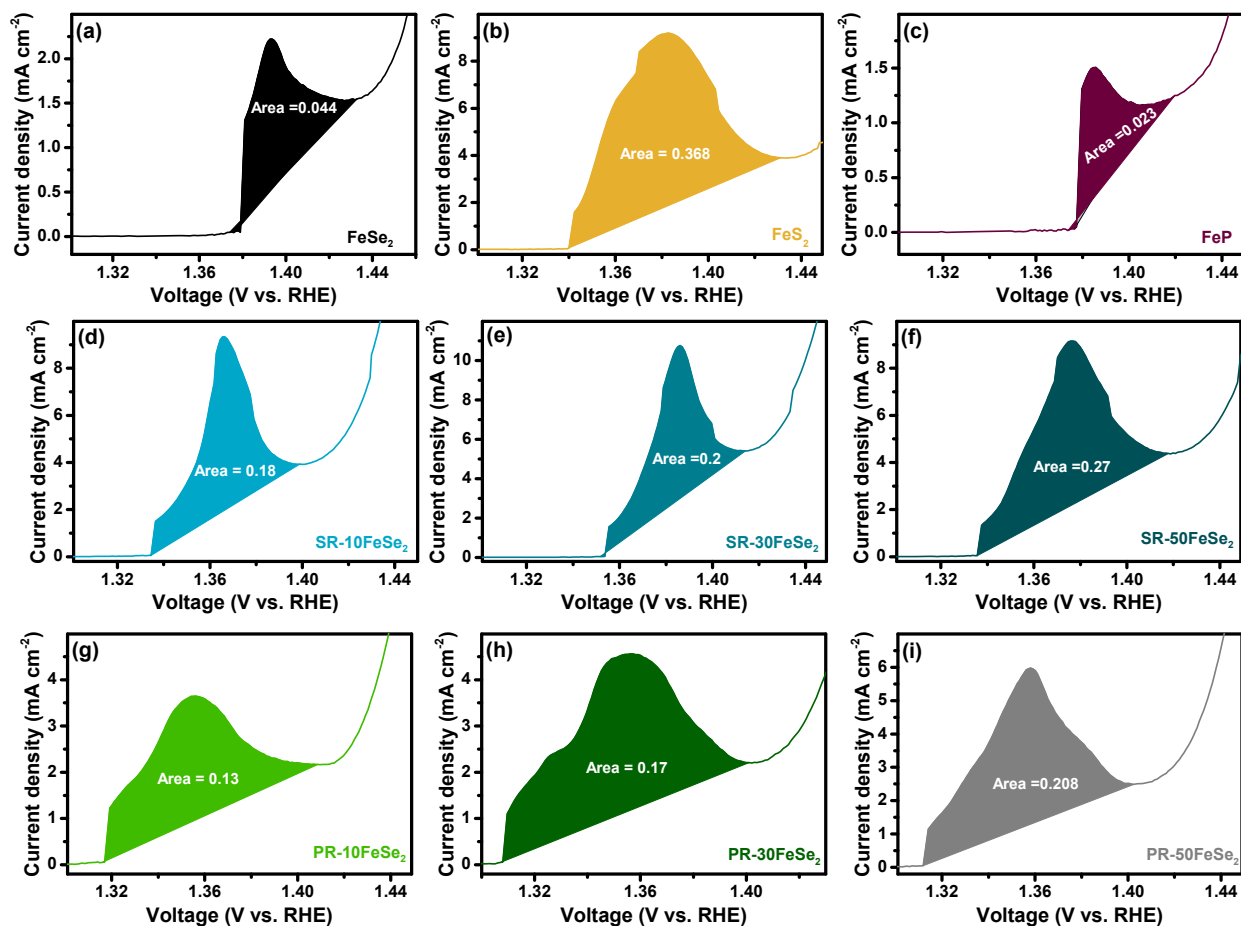

**Figure S6:** The integrated areas of the oxidation peak from LSVs at a scan rate of  $1\text{ mV s}^{-1}$  for all the electrodes.

“To understand the difference in performance between SR-10FeSe<sub>2</sub> and PR-30FeSe<sub>2</sub> at low and high potentials the area under the oxidation peaks at a potential of around  $\approx 1.36\text{--}1.4\text{ V vs. RHE}$  was calculated and displayed in **Figure S6** along with the amount of generated Fe<sup>3+</sup> based on the stoichiometric equation ( $\text{Fe}^{2+} \leftrightarrow \text{Fe}^{3+} + \text{e}^-$ ) (**Figure S7**). These oxidation peaks are attributed to the formation of a high valence (Fe<sup>3+</sup>) metal species prior to the onset of OER. High valence metal species are known to facilitate OH<sup>-</sup> adsorption, however excessive Fe<sup>3+</sup> (FeOOH) can result in too strong adsorption and higher charge transfer resistance. Hence, FeS<sub>2</sub> with the highest area and number of generated Fe<sup>3+</sup> showed the lowest performance. Interestingly, SR-10FeSe<sub>2</sub> and PR-30FeSe<sub>2</sub> with an almost similar area and amount of Fe<sup>3+</sup> showed similar performance, with SR-10FeSe<sub>2</sub> showing better performance at potentials lower than 1.5 V vs. RHE and PR-30FeSe<sub>2</sub> at potentials higher than 1.5 V vs. RHE. This can be explained by the facilitated OH<sup>-</sup> adsorption on the SR-10FeSe<sub>2</sub> surface owing to a slightly higher amount of Fe<sup>3+</sup> which could lead to a lower rate of OOH deprotonation at the later stage of OER (higher potential). Accordingly, the relatively lower number of Fe<sup>3+</sup> on PR-30FeSe<sub>2</sub> leads to a lower affinity of OH<sup>-</sup> at lower applied potentials

compared to the SR-10FeSe<sub>2</sub>, however results in a facilitated OOH deprotonation at higher applied potentials. After reaching an optimum value, the unfavorable effect of excessive oxidation (more Fe<sup>3+</sup>) is evidenced by the decline in current density and rise in overpotential (**Figures 3a and c**) with increasing Fe<sup>3+</sup> (increasing S/P).

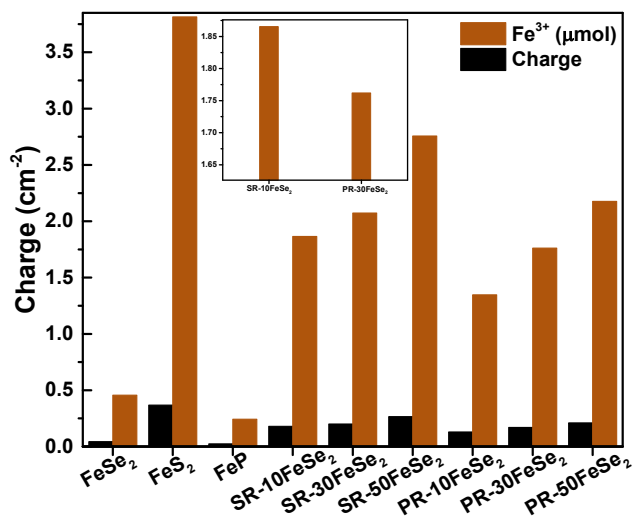

**Figure S7:** Calculated charge from integrated areas given in Figure S6 and amount of generated Fe<sup>3+</sup>.

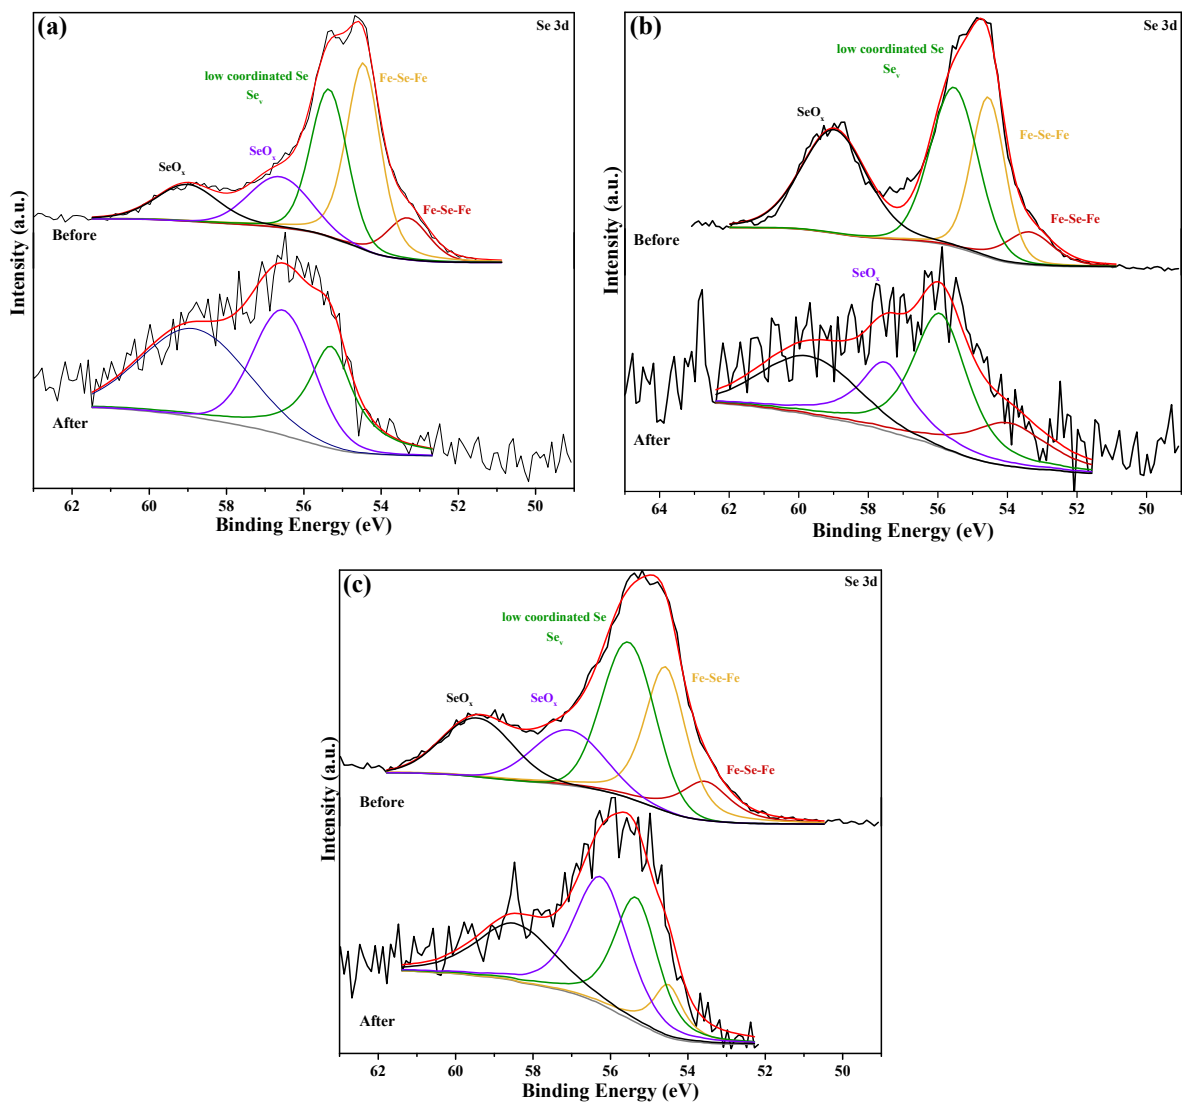

**Figure S8:** Se 3d spectrum before and after OER (a) FeSe<sub>2</sub>, (b) SR-10FeSe<sub>2</sub> and (c) PR-30FeSe<sub>2</sub>.

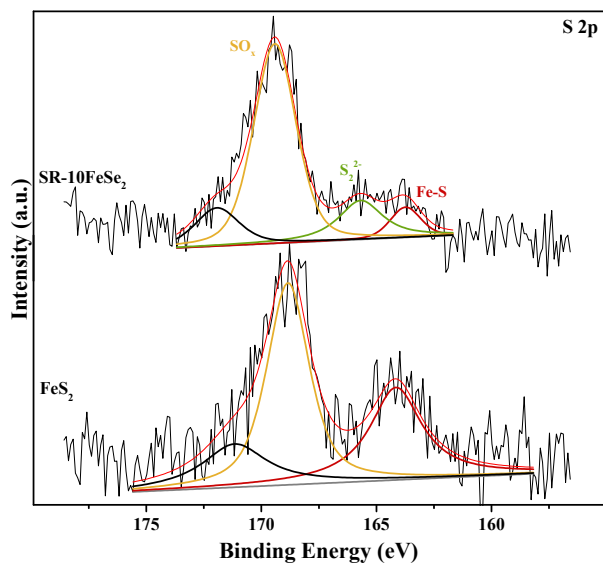

**Figure S9:** S 2p spectra after 2h of OER.

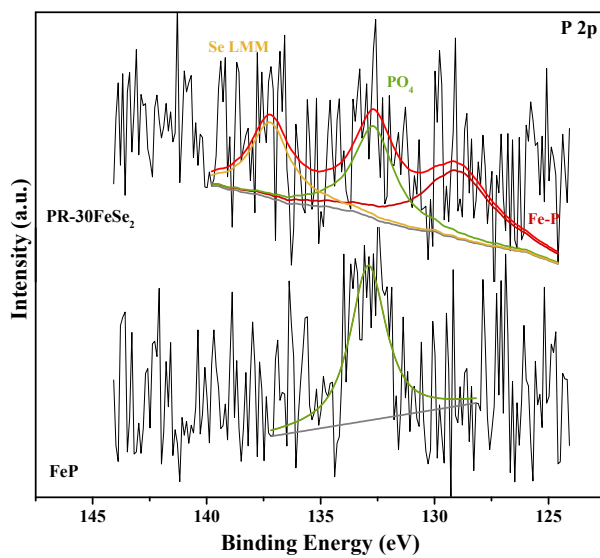

**Figure S10:** P 2p spectra after 2h of OER.

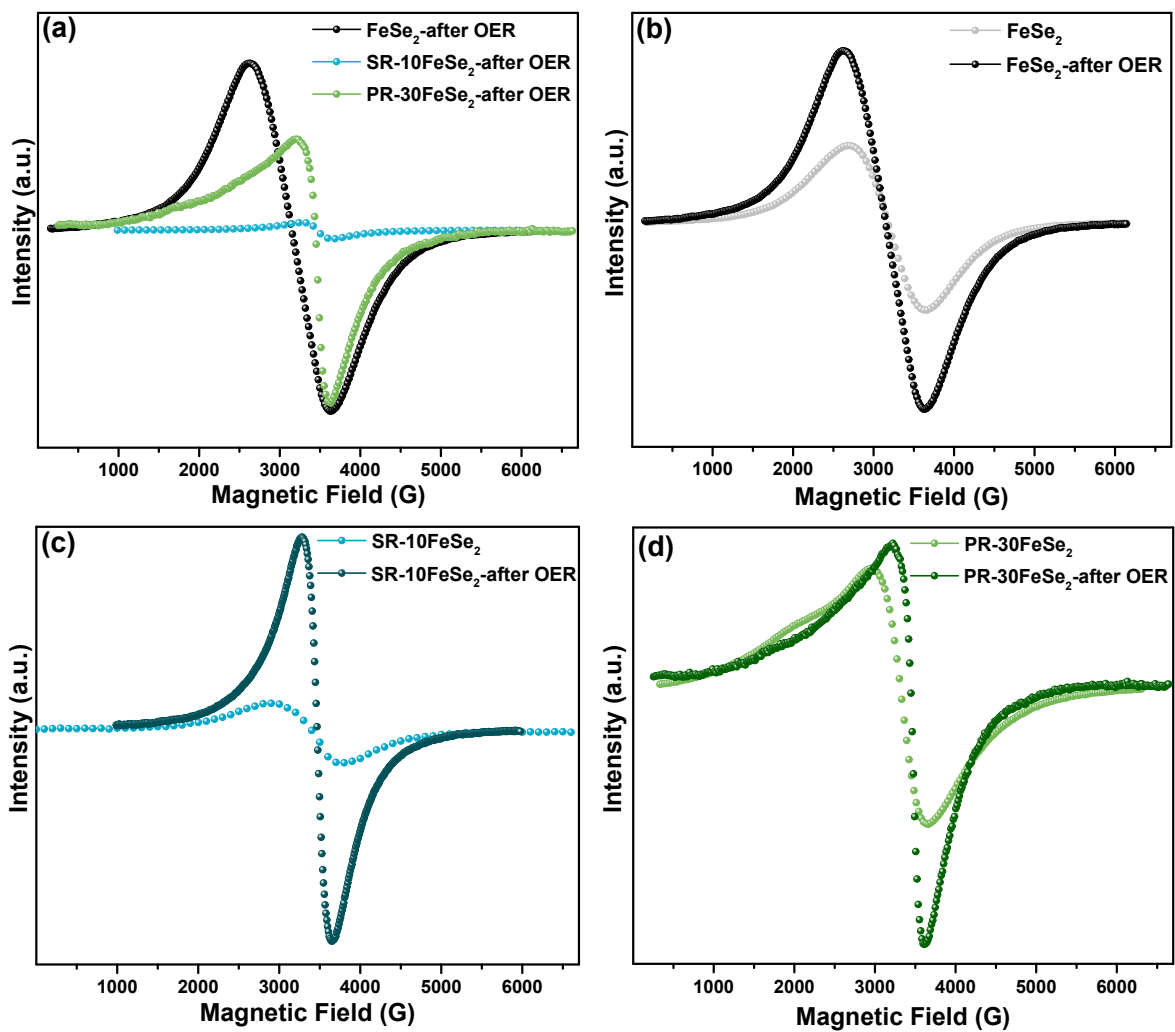

**Figure S11:** EPR spectra: (a) after 2h OER, before and after 2h of OER (b) FeSe<sub>2</sub>, (c) SR-10FeSe<sub>2</sub>, and (d) PR-30FeSe<sub>2</sub>.



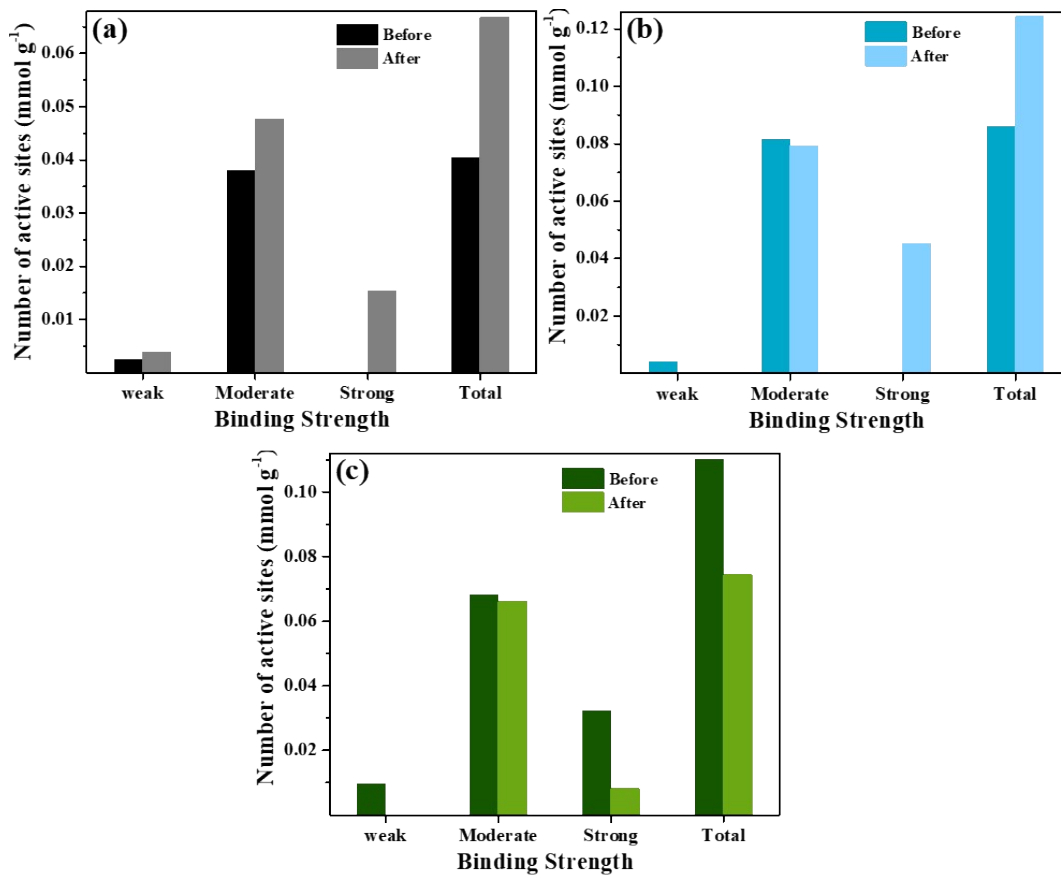

**Figure S12:** Number of active sites calculated from NH<sub>3</sub> TPD spectrum before and after 2h OER for (a) FeSe<sub>2</sub>, (b) SR-10FeSe<sub>2</sub>, and (c) PR-30FeSe<sub>2</sub>.

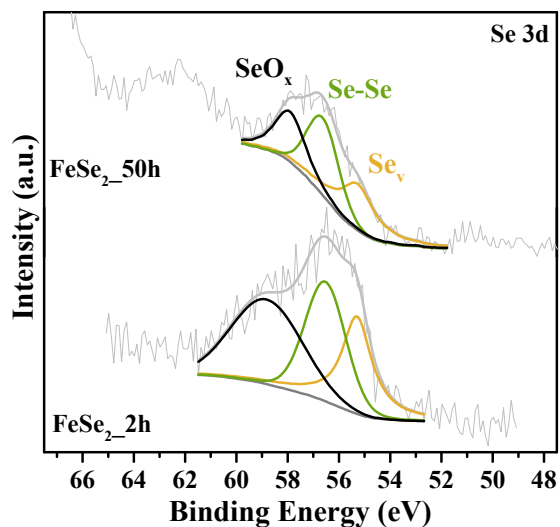

**Figure S13:** Se 3d spectrum of FeSe<sub>2</sub> after 2 and 50h OER.

**Table S3:** Performance comparison with previous reports

| <b>Electrocatalysts</b>                                               | <b>Year</b> | <b>Overpotential @10mA cm<sup>-2</sup></b> | <b>References</b> |
|-----------------------------------------------------------------------|-------------|--------------------------------------------|-------------------|
| NiPS <sub>3</sub> quantum sheets                                      | 2021        | 250                                        | 2                 |
| NiPS <sub>3</sub> Nanosheet-Graphene composite                        | 2018        | 294                                        | 3                 |
| Co <sub>0.37</sub> S <sub>0.38</sub> P <sub>0.02</sub>                | 2020        | 288                                        | 4                 |
| Se-Co <sub>3</sub> S <sub>4</sub> -V <sub>S/Se</sub> -V <sub>Co</sub> | 2022        | 289.5                                      | 5                 |
| N-Ni <sub>3</sub> S <sub>2</sub> /NF                                  | 2017        | @100-330                                   | 6                 |
| 0.01S-FeOOH <sub>+1000</sub> /IF                                      | 2022        | @100-254                                   | 7                 |
| Se/Fe-Co <sub>9</sub> S <sub>8</sub> -0.14                            | 2020        | 298                                        | 8                 |
| Se <sub>x</sub> -Co <sub>3</sub> S <sub>4</sub>                       | 2022        | 289                                        | 5                 |
| FePSe <sub>3</sub>                                                    | 2018        | 740                                        | 9                 |
| Mn-Co oxyphosphide                                                    | 2017        | 370                                        | 10                |
| FeCoO <sub>x</sub> -V <sub>o</sub> -S                                 | 2020        | 250                                        | 11                |
| NiFe(Oxy)Sulfide                                                      | 2017        | 286                                        | 12                |
| Co <sub>3</sub> FeS <sub>1.5</sub> (OH) <sub>6</sub>                  | 2017        | 358                                        | 13                |
| CoMnON                                                                | 2016        | 470                                        | 14                |
| CoFePO                                                                | 2016        | 333                                        | 15                |
| P-Co <sub>3</sub> O <sub>4</sub>                                      | 2017        | 280                                        | 16                |
| FeNiSeO                                                               | 2021        | 257                                        | 17                |
| S-Ni <sub>3</sub> Se <sub>4</sub> -2                                  | 2021        | 275                                        | 18                |
| <b>SR-10FeSe<sub>2</sub></b>                                          |             | <b>212</b>                                 | <b>This work</b>  |
|                                                                       |             | <b>@600-290</b>                            |                   |
| <b>PR-30FeSe<sub>2</sub></b>                                          |             | <b>223</b>                                 | <b>This work</b>  |
|                                                                       |             | <b>@600-275</b>                            |                   |

## References

- 1 B. Z. Desalegn, K. Hern and J. Gil Seo, *ChemCatChem*, , DOI:10.1002/cctc.202100969.
- 2 K. Huang, Y. Xu, Y. Song, R. Wang, H. Wei, Y. Long, M. Lei, H. Tang, J. Guo and H. Wu, *J. Mater. Sci. Technol.*, 2021, **65**, 1–6.
- 3 S. Xue, L. Chen, Z. Liu, H. M. Cheng and W. Ren, *ACS Nano*, 2018, **12**, 5297–5305.
- 4 S. Liu, C. Che, H. Jing, J. Zhao, X. Mu, S. Zhang, C. Chen and S. Mu, *Nanoscale*, 2020, **12**, 3129–3134.
- 5 X. Gu, S. Li, W. Shao, X. Mu, Y. Yang, Y. Ge, W. Meng, G. Liu, S. Liu and S. Mu, *Small*, 2022, **18**, 1–7.
- 6 P. Chen, T. Zhou, M. Zhang, Y. Tong, C. Zhong, N. Zhang, L. Zhang, C. Wu and Y. Xie, *Adv. Mater.*, 2017, **29**, 1–6.
- 7 X. Y. Zhang, F. T. Li, Y. W. Dong, B. Dong, F. N. Dai, C. G. Liu and Y. M. Chai, *Appl. Catal. B Environ.*, 2022, **315**, 121571.
- 8 D. Zhang, J. Zhang, X. Fu, J. Pan and Y. Wang, *Nanotechnology*.
- 9 D. Mukherjee, P. Muthu Austeria and S. Sampath, *ACS Appl. Energy Mater.*, 2018, **1**, 220–231.
- 10 B. Y. Guan, L. Yu and X. W. D. Lou, *Angew. Chemie - Int. Ed.*, 2017, **56**, 2386–2389.
- 11 L. Zhuang, Y. Jia, H. Liu, Z. Li, M. Li, L. Zhang, X. Wang, D. Yang, Z. Zhu and X. Yao, *Angew. Chemie - Int. Ed.*, 2020, **59**, 14664–14670.
- 12 B. Q. Li, S. Y. Zhang, C. Tang, X. Cui and Q. Zhang, *Small*, 2017, **13**, 1–6.
- 13 H. F. Wang, C. Tang, B. Wang, B. Q. Li and Q. Zhang, *Adv. Mater.*, 2017, **29**, 1–9.
- 14 Y. Li, K. A. Kuttiyiel, L. Wu, Y. Zhu, E. Fujita, R. R. Adzic and K. Sasaki, *ChemSusChem*, 2017, **10**, 68–73.
- 15 J. Duan, S. Chen, A. Vasileff and S. Z. Qiao, *ACS Nano*, 2016, **10**, 8738–8745.
- 16 Z. Xiao, Y. Wang, Y. C. Huang, Z. Wei, C. L. Dong, J. Ma, S. Shen, Y. Li and S. Wang, *Energy Environ. Sci.*, 2017, **10**, 2563–2569.
- 17 L. Zhang, C. Lu, F. Ye, Z. Wu, Y. Wang, L. Jiang, L. Zhang, C. Cheng, Z. Sun and L. Hu, *Appl. Catal. B Environ.*, 2021, **284**, 119758.
- 18 K. Wan, J. Luo, X. Zhang, P. Subramanian and J. Fransaer, *J. Energy Chem.*, 2021, **62**, 198–203.
